# Supplementary material for: Neuregulin (NRG-1β) Is Pro-Myogenic and Anti-Cachectic in Respiratory Muscles of Post-Myocardial Infarcted Swine
Source: MDPI journal article supplement (doi:10.3390/biology11050682), 2022-04-29
Supplement: s1 [file s1]

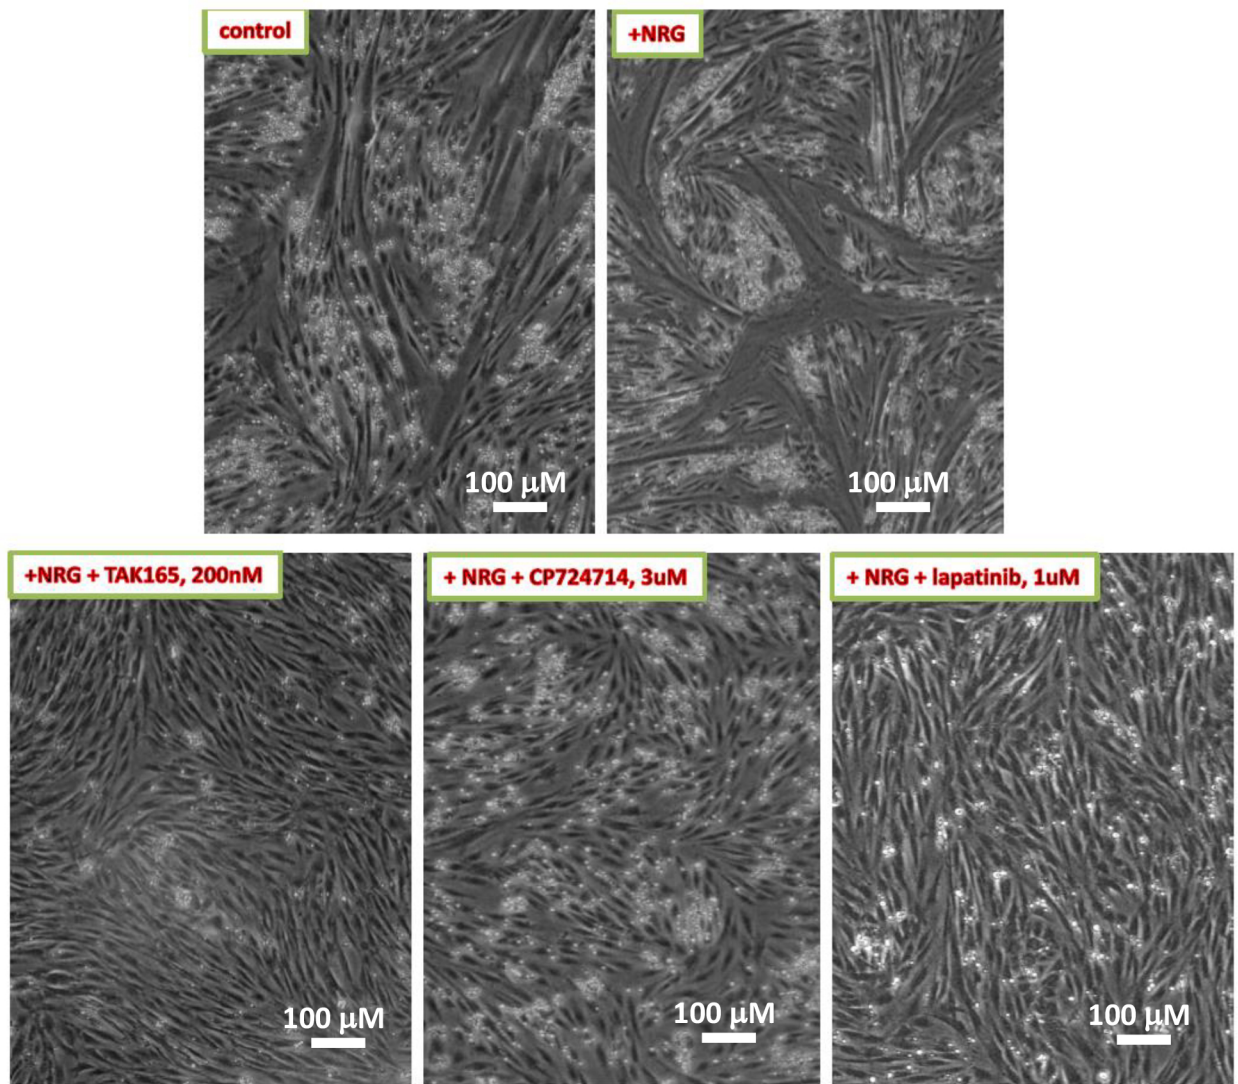

**Figure S6:** L6 cells were differentiated in DMEM with 0.2% BSA in the absence (control, top left) or presence of NRG with 0.2 uM TAK165, 3 uM of CP724714 or 1uM lapatinib.
