# Supplementary material for: Neuregulin (NRG-1β) Is Pro-Myogenic and Anti-Cachectic in Respiratory Muscles of Post-Myocardial Infarcted Swine
Source: MDPI journal article supplement (doi:10.3390/biology11050682), 2022-04-29
Supplement: s1 [file s1]

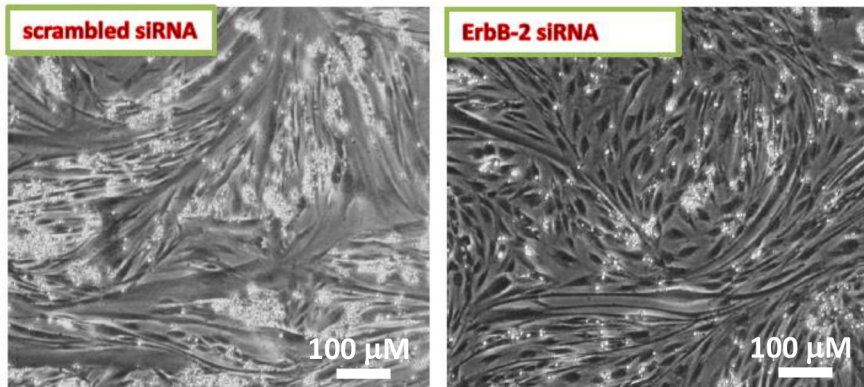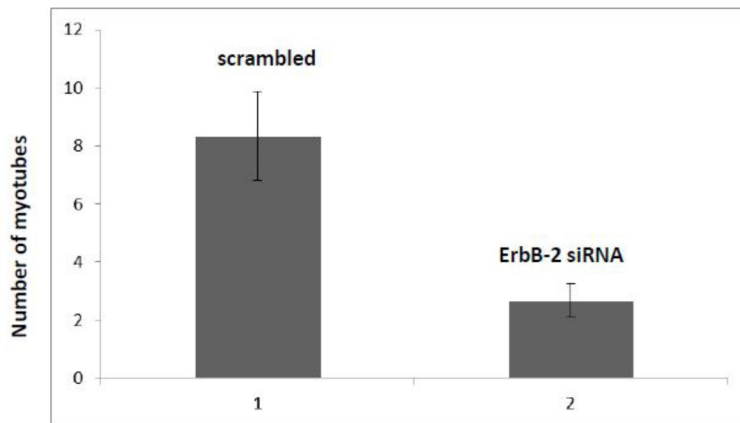

**Figure S7:** L6 cells were transfected with ErbB-2-specific siRNA or scrambled siRNA as a control and then differentiated in DMEM without serum. In cells transfected with ErbB-2 siRNA, the levels of ErbB-2 were significantly downregulated (Top right), compared to control (top left) as depicted graphically (bottom).
