# Supplementary material for: Neuregulin (NRG-1β) Is Pro-Myogenic and Anti-Cachectic in Respiratory Muscles of Post-Myocardial Infarcted Swine
Source: MDPI journal article supplement (doi:10.3390/biology11050682), 2022-04-29
Supplement: s1 [file s1]

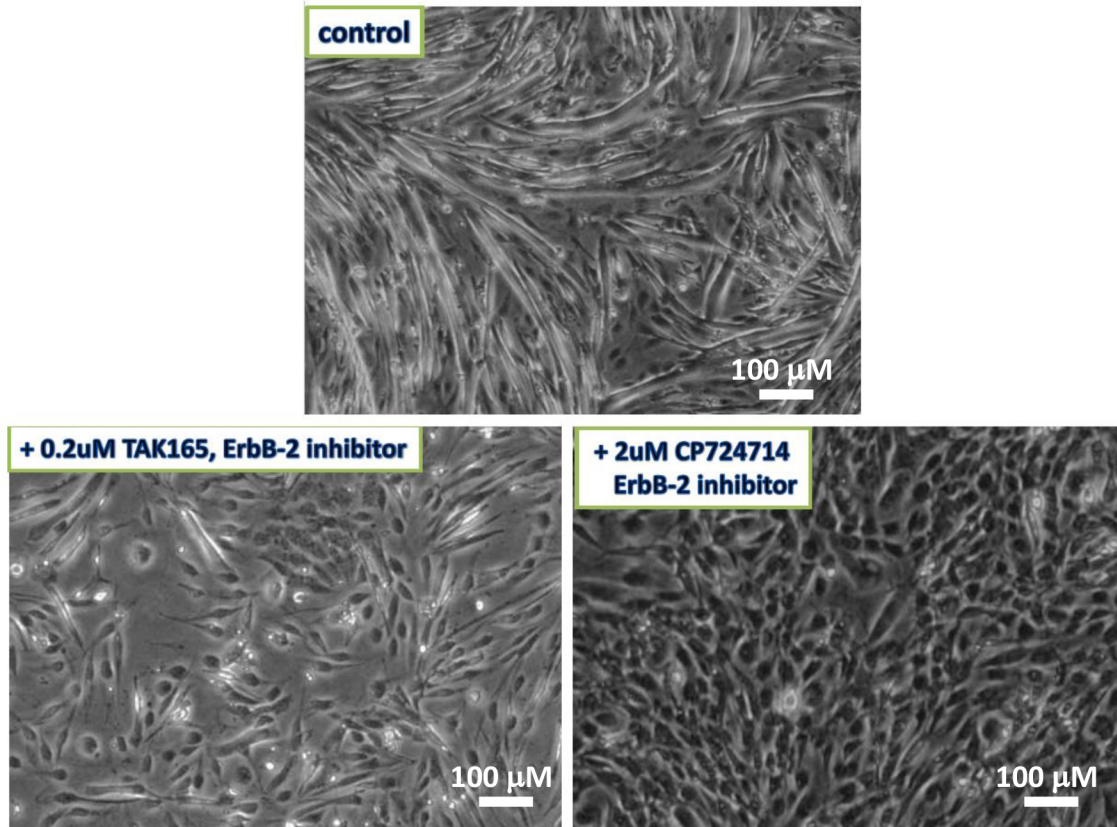

**Figure S5:** C2C12 myoblasts were differentiated in DMEM with 2% horse serum in the presence or absence of 2  $\mu$ M of CP724714 or 0.2  $\mu$ M TAK165. Representative images of control cells (top left) and cells treated with the inhibitors are shown.
