# Supplementary material for: Neuregulin (NRG-1β) Is Pro-Myogenic and Anti-Cachectic in Respiratory Muscles of Post-Myocardial Infarcted Swine
Source: MDPI journal article supplement (doi:10.3390/biology11050682), 2022-04-29
Supplement: s1 [file s1]

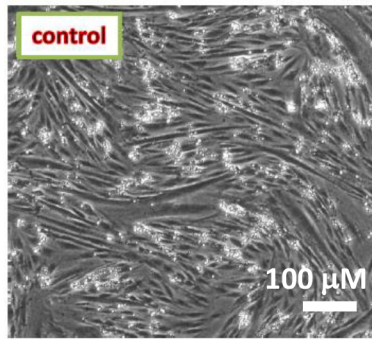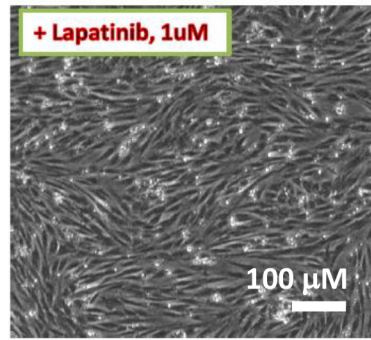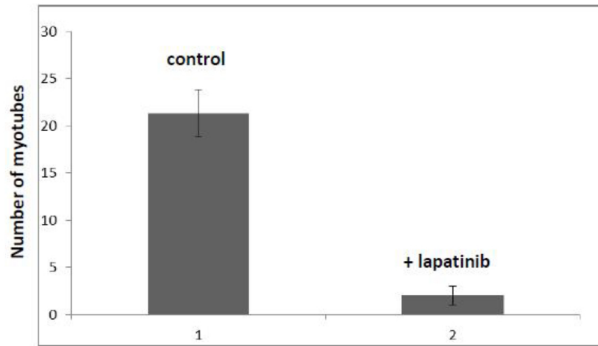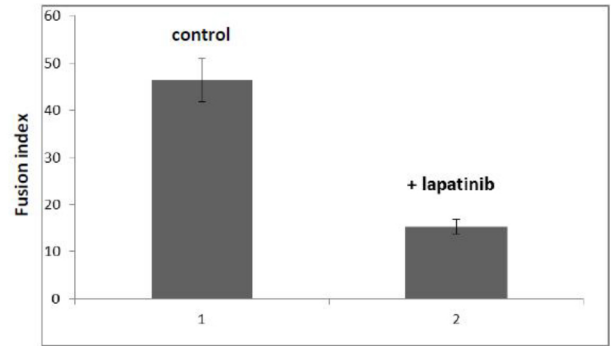

**Figure S3:** L6 cells were differentiated in DMEM with 0.2% BSA in the presence of 1  $\mu$ M of the ErbB2 inhibitor, lapatinib (top right), which inhibited myotube formation, as measured by number of myotubes (bottom left) and fusion index (bottom right).
