# Supplementary material for: Neuregulin (NRG-1β) Is Pro-Myogenic and Anti-Cachectic in Respiratory Muscles of Post-Myocardial Infarcted Swine
Source: MDPI journal article supplement (doi:10.3390/biology11050682), 2022-04-29
Supplement: s1 [file s1]

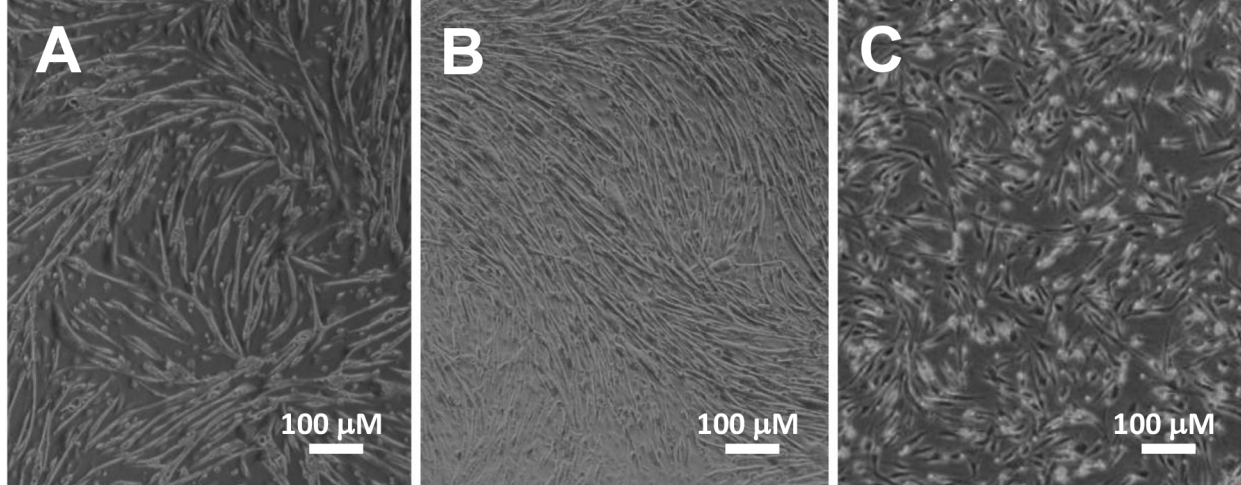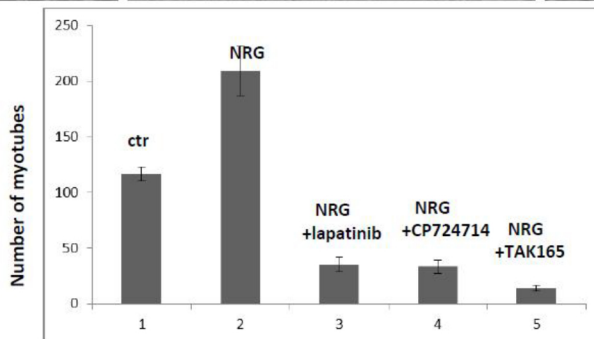

**Figure S4:** C2C12 myoblasts were differentiated in the presence or absence of NRG and 1uM lapatinib, 2 uM of CP724714 or 0.2 uM TAK165. Representative images of control cells (A), cells treated with NRG only (B) and NRG + lapatinib (C) are shown. Number of myotubes after treatment with NRG in the presence or absence of the various inhibitors are shown graphically. Ctr = untreated control
